# Supplementary material
Source: Springer Nature journal article supplement (https://www.springermedizin.de/resource/supplementary/13012_2014_763_MOESM1_ESM.pdf/9630650)

## Study Background/Design

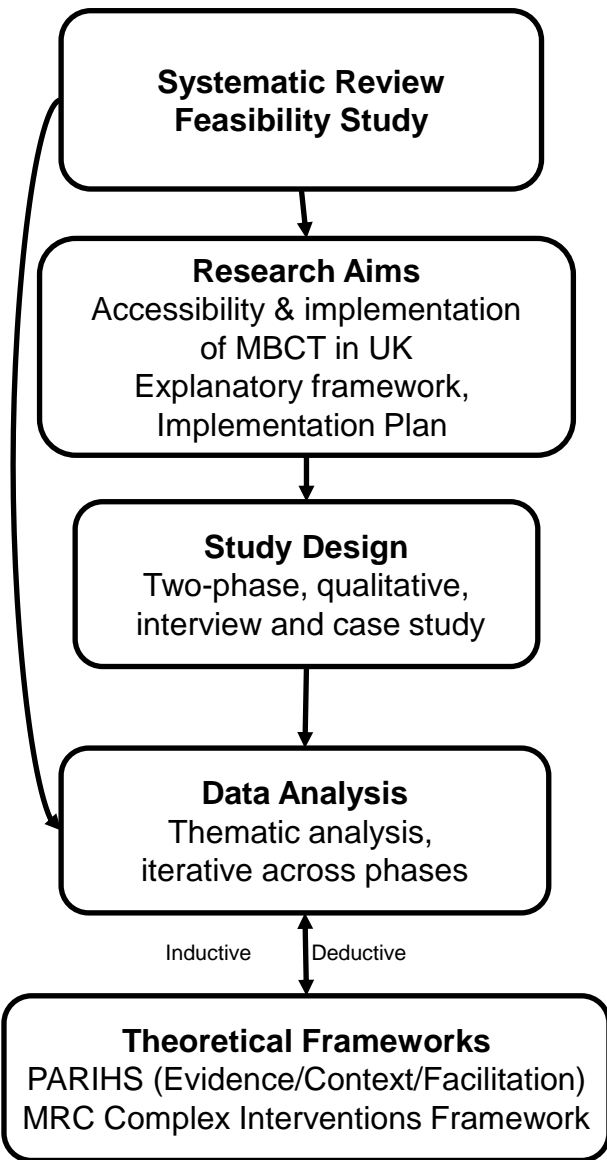

## Project Flow Chart - Data Synthesis

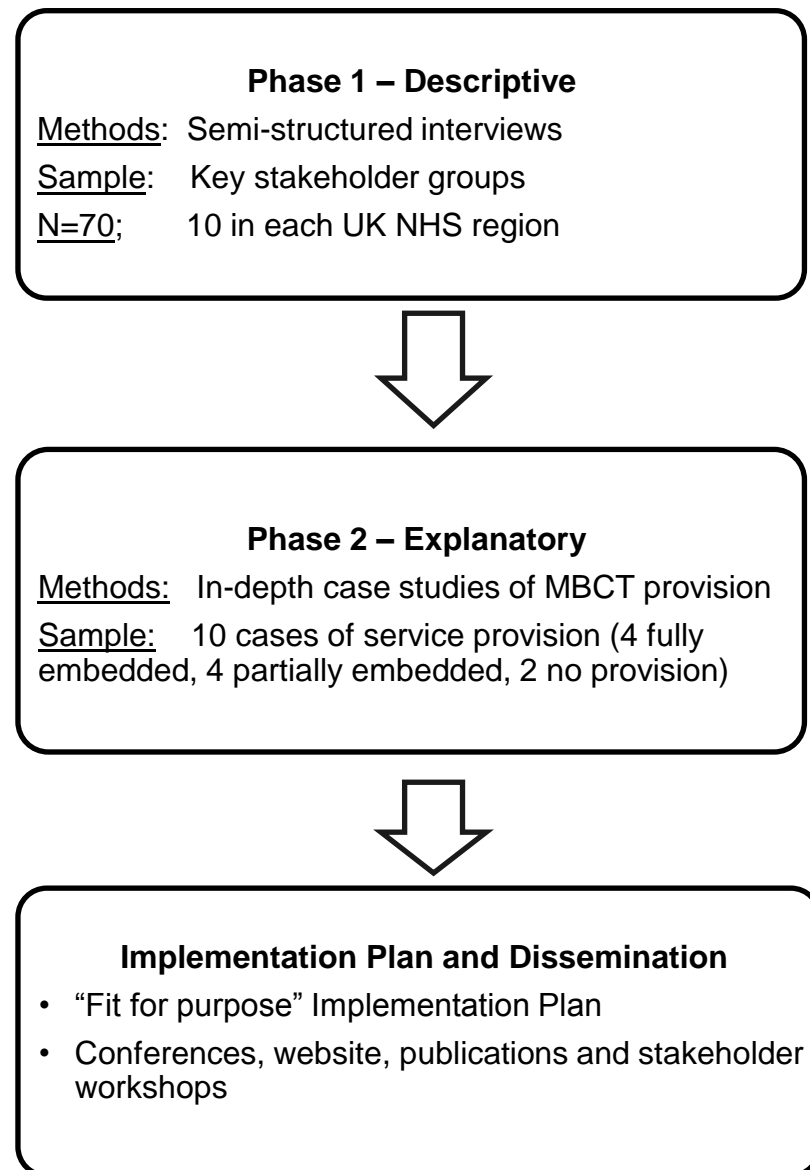

Supplement: MOESM1 [file 9630650]
